# Supplementary material for: Outlier Profiles of Atomic Structures Derived from X-ray Crystallography and from Cryo-Electron Microscopy
Source: PubMed Central journal article supplement (PMC7181022; doi:10.3390/molecules25071540), 2020-03-28
Supplement: molecules-25-01540-s001.pdf [file molecules-25-01540-s001.pdf]

**Table S1.** The secondary structure of the outlier residue in X-ray-1.5

|       | Loop |     |     | Sheet |     |    | Helix |   |        | -      | T      | S      | Helix  | Sheet |
|-------|------|-----|-----|-------|-----|----|-------|---|--------|--------|--------|--------|--------|-------|
|       | -    | S   | T   | B     | E   | G  | H     | I |        |        |        |        |        |       |
| ARG   | 14   | 15  | 5   | 0     | 2   | 2  | 0     | 0 | 36.84% | 13.16% | 39.47% | 5.26%  | 5.26%  |       |
| ASN   | 18   | 11  | 25  | 1     | 3   | 5  | 3     | 0 | 27.27% | 37.88% | 16.67% | 12.12% | 6.06%  |       |
| ASP   | 37   | 28  | 33  | 0     | 14  | 11 | 26    | 3 | 24.34% | 21.71% | 18.42% | 26.32% | 9.21%  |       |
| CYS   | 17   | 1   | 8   | 0     | 11  | 1  | 4     | 0 | 40.48% | 19.05% | 2.38%  | 11.90% | 26.19% |       |
| GLN   | 25   | 9   | 14  | 0     | 9   | 6  | 10    | 1 | 33.78% | 18.92% | 12.16% | 22.97% | 12.16% |       |
| GLU   | 60   | 32  | 37  | 0     | 11  | 12 | 18    | 0 | 35.29% | 21.76% | 18.82% | 17.65% | 6.47%  |       |
| HIS   | 7    | 8   | 7   | 1     | 0   | 4  | 5     | 0 | 21.88% | 21.88% | 25.00% | 28.13% | 3.13%  |       |
| ILE   | 30   | 7   | 18  | 4     | 17  | 2  | 11    | 0 | 33.71% | 20.22% | 7.87%  | 14.61% | 23.60% |       |
| LEU   | 61   | 24  | 23  | 0     | 46  | 7  | 34    | 1 | 31.12% | 11.73% | 12.24% | 21.43% | 23.47% |       |
| LYS   | 25   | 15  | 10  | 0     | 8   | 2  | 11    | 0 | 35.21% | 14.08% | 21.13% | 18.31% | 11.27% |       |
| MET   | 9    | 4   | 5   | 0     | 3   | 2  | 7     | 0 | 30.00% | 16.67% | 13.33% | 30.00% | 10.00% |       |
| PHE   | 7    | 7   | 2   | 0     | 5   | 0  | 2     | 0 | 30.43% | 8.70%  | 30.43% | 8.70%  | 21.74% |       |
| PRO   | 49   | 22  | 23  | 0     | 6   | 5  | 8     | 0 | 43.36% | 20.35% | 19.47% | 11.50% | 5.31%  |       |
| SER   | 41   | 27  | 21  | 0     | 20  | 1  | 19    | 0 | 31.78% | 16.28% | 20.93% | 15.50% | 15.50% |       |
| THR   | 31   | 15  | 10  | 0     | 18  | 3  | 4     | 1 | 37.80% | 12.20% | 18.29% | 9.76%  | 21.95% |       |
| TRP   | 0    | 1   | 0   | 0     | 2   | 1  | 2     | 0 | 0.00%  | 0.00%  | 16.67% | 50.00% | 33.33% |       |
| TYR   | 1    | 11  | 4   | 0     | 6   | 1  | 7     | 0 | 3.33%  | 13.33% | 36.67% | 26.67% | 20.00% |       |
| VAL   | 22   | 11  | 12  | 0     | 20  | 3  | 7     | 0 | 29.33% | 16.00% | 14.67% | 13.33% | 26.67% |       |
| Total | 454  | 248 | 257 | 6     | 201 | 68 | 178   | 6 | 32.02% | 18.12% | 17.49% | 17.77% | 14.60% |       |

**Table S2.** The secondary structure of the outlier residue in EM-0-4-2016

|     | Loop |     |     | Sheet |     |    | Helix |    |        | -      | T      | S      | Helix  | Sheet |
|-----|------|-----|-----|-------|-----|----|-------|----|--------|--------|--------|--------|--------|-------|
|     | -    | S   | T   | B     | E   | G  | H     | I  |        |        |        |        |        |       |
| ARG | 29   | 22  | 14  | 0     | 1   | 15 | 7     | 0  | 32.95% | 15.91% | 25.00% | 25.00% | 1.14%  |       |
| ASN | 13   | 7   | 2   | 0     | 0   | 0  | 1     | 0  | 56.52% | 8.70%  | 30.43% | 4.35%  | 0.00%  |       |
| ASP | 12   | 3   | 2   | 0     | 1   | 2  | 15    | 0  | 34.29% | 5.71%  | 8.57%  | 48.57% | 2.86%  |       |
| CYS | 10   | 4   | 6   | 0     | 9   | 0  | 2     | 1  | 31.25% | 18.75% | 12.50% | 9.38%  | 28.13% |       |
| GLN | 78   | 24  | 21  | 5     | 18  | 18 | 51    | 0  | 36.28% | 9.77%  | 11.16% | 32.09% | 10.70% |       |
| GLU | 93   | 111 | 53  | 0     | 3   | 2  | 89    | 1  | 26.42% | 15.06% | 31.53% | 26.14% | 0.85%  |       |
| HIS | 1    | 3   | 0   | 0     | 0   | 1  | 3     | 0  | 12.50% | 0.00%  | 37.50% | 50.00% | 0.00%  |       |
| ILE | 337  | 103 | 48  | 6     | 57  | 14 | 126   | 5  | 48.42% | 6.90%  | 14.80% | 20.83% | 9.05%  |       |
| LEU | 291  | 145 | 149 | 12    | 108 | 30 | 248   | 17 | 29.10% | 14.90% | 14.50% | 29.50% | 12.00% |       |
| LYS | 69   | 38  | 15  | 0     | 11  | 2  | 7     | 0  | 48.59% | 10.56% | 26.76% | 6.34%  | 7.75%  |       |
| MET | 56   | 43  | 20  | 9     | 5   | 3  | 32    | 0  | 33.33% | 11.90% | 25.60% | 20.83% | 8.33%  |       |
| PHE | 20   | 9   | 2   | 0     | 8   | 0  | 3     | 0  | 47.62% | 4.76%  | 21.43% | 7.14%  | 19.05% |       |
| PRO | 85   | 38  | 14  | 0     | 2   | 11 | 26    | 0  | 48.30% | 7.95%  | 21.59% | 21.02% | 1.14%  |       |
| SER | 15   | 3   | 1   | 0     | 0   | 0  | 2     | 0  | 71.43% | 4.76%  | 14.29% | 9.52%  | 0.00%  |       |
| THR | 72   | 12  | 7   | 0     | 33  | 1  | 10    | 0  | 53.33% | 5.19%  | 8.89%  | 8.15%  | 24.44% |       |
| TRP | 27   | 1   | 2   | 0     | 3   | 4  | 16    | 0  | 50.94% | 3.77%  | 1.89%  | 37.74% | 5.66%  |       |

|       |      |     |     |    |     |     |     |    |        |        |        |        |        |
|-------|------|-----|-----|----|-----|-----|-----|----|--------|--------|--------|--------|--------|
| TYR   | 6    | 9   | 12  | 0  | 15  | 3   | 15  | 0  | 10.00% | 20.00% | 15.00% | 30.00% | 25.00% |
| VAL   | 191  | 50  | 22  | 2  | 29  | 2   | 41  | 6  | 55.69% | 6.41%  | 14.58% | 14.29% | 9.04%  |
| Total | 1405 | 625 | 390 | 34 | 303 | 108 | 694 | 30 | 39.15% | 10.87% | 17.41% | 23.18% | 9.39%  |

**Table S3.** The secondary structure of the outlier residue in EM-0-4-2018

|       | Loop |     |     | Sheet |     |    | Helix |   |        | -      | T      | S       | Helix  | Sheet |
|-------|------|-----|-----|-------|-----|----|-------|---|--------|--------|--------|---------|--------|-------|
|       | -    | S   | T   | B     | E   | G  | H     | I |        |        |        |         |        |       |
| ARG   | 12   | 9   | 2   | 0     | 0   | 0  | 5     | 0 | 42.86% | 7.14%  | 32.14% | 17.86%  | 0.00%  |       |
| ASN   | 3    | 1   | 0   | 0     | 0   | 0  | 1     | 0 | 60.00% | 0.00%  | 20.00% | 20.00%  | 0.00%  |       |
| ASP   | 5    | 7   | 4   | 0     | 2   | 0  | 5     | 0 | 21.74% | 17.39% | 30.43% | 21.74%  | 8.70%  |       |
| CYS   | 7    | 1   | 1   | 0     | 1   | 0  | 1     | 0 | 63.64% | 9.09%  | 9.09%  | 9.09%   | 9.09%  |       |
| GLN   | 21   | 12  | 4   | 0     | 2   | 1  | 10    | 0 | 42.00% | 8.00%  | 24.00% | 22.00%  | 4.00%  |       |
| GLU   | 50   | 22  | 19  | 0     | 17  | 0  | 17    | 1 | 39.68% | 15.08% | 17.46% | 14.29%  | 13.49% |       |
| HIS   | 0    | 0   | 0   | 0     | 0   | 0  | 1     | 0 | 0.00%  | 0.00%  | 0.00%  | 100.00% | 0.00%  |       |
| ILE   | 73   | 26  | 11  | 1     | 7   | 2  | 24    | 0 | 50.69% | 7.64%  | 18.06% | 18.06%  | 5.56%  |       |
| LEU   | 280  | 172 | 61  | 4     | 103 | 18 | 162   | 0 | 35.00% | 7.63%  | 21.50% | 22.50%  | 13.38% |       |
| LYS   | 16   | 6   | 9   | 0     | 1   | 1  | 5     | 0 | 42.11% | 23.68% | 15.79% | 15.79%  | 2.63%  |       |
| MET   | 7    | 4   | 3   | 0     | 0   | 1  | 7     | 0 | 31.82% | 13.64% | 18.18% | 36.36%  | 0.00%  |       |
| PHE   | 4    | 1   | 1   | 0     | 2   | 0  | 4     | 1 | 30.77% | 7.69%  | 7.69%  | 38.46%  | 15.38% |       |
| PRO   | 19   | 35  | 8   | 0     | 4   | 1  | 15    | 0 | 23.17% | 9.76%  | 42.68% | 19.51%  | 4.88%  |       |
| SER   | 1    | 0   | 1   | 0     | 0   | 0  | 0     | 0 | 50.00% | 50.00% | 0.00%  | 0.00%   | 0.00%  |       |
| THR   | 3    | 2   | 4   | 0     | 0   | 0  | 0     | 0 | 33.33% | 44.44% | 22.22% | 0.00%   | 0.00%  |       |
| TRP   | 4    | 1   | 0   | 0     | 0   | 0  | 2     | 0 | 57.14% | 0.00%  | 14.29% | 28.57%  | 0.00%  |       |
| TYR   | 5    | 14  | 2   | 0     | 5   | 0  | 8     | 0 | 14.71% | 5.88%  | 41.18% | 23.53%  | 14.71% |       |
| VAL   | 49   | 12  | 8   | 0     | 2   | 0  | 8     | 0 | 62.03% | 10.13% | 15.19% | 10.13%  | 2.53%  |       |
| Total | 559  | 325 | 138 | 5     | 146 | 24 | 275   | 2 | 37.92% | 9.36%  | 22.05% | 20.42%  | 10.24% |       |

**Table S4.** The secondary structure of the outlier residue in EM-4-6-2016

|     | Loop |     |    | Sheet |    |    | Helix |   |        | -      | T      | S      | Helix  | Sheet |
|-----|------|-----|----|-------|----|----|-------|---|--------|--------|--------|--------|--------|-------|
|     | -    | S   | T  | B     | E  | G  | H     | I |        |        |        |        |        |       |
| ARG | 42   | 20  | 39 | 0     | 2  | 1  | 26    | 2 | 31.82% | 29.55% | 15.15% | 21.97% | 1.52%  |       |
| ASN | 17   | 18  | 10 | 0     | 6  | 1  | 31    | 0 | 20.48% | 12.05% | 21.69% | 38.55% | 7.23%  |       |
| ASP | 53   | 15  | 18 | 3     | 8  | 6  | 37    | 0 | 37.86% | 12.86% | 10.71% | 30.71% | 7.86%  |       |
| CYS | 33   | 2   | 4  | 0     | 20 | 0  | 3     | 0 | 53.23% | 6.45%  | 3.23%  | 4.84%  | 32.26% |       |
| GLN | 67   | 28  | 8  | 2     | 22 | 2  | 11    | 0 | 47.86% | 5.71%  | 20.00% | 9.29%  | 17.14% |       |
| GLU | 127  | 101 | 46 | 1     | 4  | 1  | 18    | 1 | 42.47% | 15.38% | 33.78% | 6.69%  | 1.67%  |       |
| HIS | 24   | 18  | 14 | 0     | 17 | 3  | 10    | 2 | 27.27% | 15.91% | 20.45% | 17.05% | 19.32% |       |
| ILE | 241  | 125 | 33 | 3     | 24 | 6  | 58    | 1 | 49.08% | 6.72%  | 25.46% | 13.24% | 5.50%  |       |
| LEU | 250  | 124 | 72 | 7     | 66 | 16 | 223   | 3 | 32.85% | 9.46%  | 16.29% | 31.80% | 9.59%  |       |
| LYS | 100  | 42  | 28 | 0     | 6  | 6  | 20    | 0 | 49.50% | 13.86% | 20.79% | 12.87% | 2.97%  |       |
| MET | 39   | 33  | 9  | 2     | 5  | 0  | 9     | 0 | 40.21% | 9.28%  | 34.02% | 9.28%  | 7.22%  |       |
| PHE | 72   | 49  | 16 | 0     | 59 | 3  | 52    | 0 | 28.69% | 6.37%  | 19.52% | 21.91% | 23.51% |       |
| PRO | 110  | 95  | 30 | 1     | 10 | 16 | 22    | 0 | 38.73% | 10.56% | 33.45% | 13.38% | 3.87%  |       |
| SER | 30   | 9   | 7  | 0     | 4  | 3  | 9     | 0 | 48.39% | 11.29% | 14.52% | 19.35% | 6.45%  |       |
| THR | 61   | 17  | 9  | 0     | 32 | 9  | 34    | 0 | 37.65% | 5.56%  | 10.49% | 26.54% | 19.75% |       |

|              |             |            |            |           |            |           |            |           |               |               |               |               |               |
|--------------|-------------|------------|------------|-----------|------------|-----------|------------|-----------|---------------|---------------|---------------|---------------|---------------|
| TRP          | 11          | 0          | 14         | 0         | 17         | 4         | 28         | 0         | 14.86%        | 18.92%        | 0.00%         | 43.24%        | 22.97%        |
| TYR          | 46          | 39         | 19         | 8         | 26         | 2         | 28         | 2         | 27.06%        | 11.18%        | 22.94%        | 18.82%        | 20.00%        |
| VAL          | 122         | 46         | 45         | 4         | 56         | 18        | 30         | 0         | 38.01%        | 14.02%        | 14.33%        | 14.95%        | 18.69%        |
| <b>Total</b> | <b>1445</b> | <b>781</b> | <b>421</b> | <b>31</b> | <b>384</b> | <b>97</b> | <b>649</b> | <b>11</b> | <b>37.84%</b> | <b>11.02%</b> | <b>20.45%</b> | <b>19.82%</b> | <b>10.87%</b> |

**Table S5.** The secondary structure of the outlier residue in EM-4-6-2018

|              | <b>Loop</b> |            | <b>Sheet</b> |           |            | <b>Helix</b> |            |          | <b>-</b>      | <b>T</b>      | <b>S</b>      | <b>Helix</b>  | <b>Sheet</b>  |
|--------------|-------------|------------|--------------|-----------|------------|--------------|------------|----------|---------------|---------------|---------------|---------------|---------------|
|              | <b>-</b>    | <b>S</b>   | <b>T</b>     | <b>B</b>  | <b>E</b>   | <b>G</b>     | <b>H</b>   | <b>I</b> |               |               |               |               |               |
| ARG          | 9           | 15         | 9            | 0         | 0          | 0            | 6          | 0        | 23.08%        | 23.08%        | 38.46%        | 15.38%        | 0.00%         |
| ASN          | 13          | 4          | 3            | 0         | 6          | 0            | 14         | 0        | 32.50%        | 7.50%         | 10.00%        | 35.00%        | 15.00%        |
| ASP          | 25          | 6          | 11           | 0         | 16         | 1            | 20         | 0        | 31.65%        | 13.92%        | 7.59%         | 26.58%        | 20.25%        |
| CYS          | 4           | 1          | 0            | 0         | 5          | 0            | 2          | 0        | 33.33%        | 0.00%         | 8.33%         | 16.67%        | 41.67%        |
| GLN          | 25          | 8          | 13           | 0         | 2          | 1            | 12         | 0        | 40.98%        | 21.31%        | 13.11%        | 21.31%        | 3.28%         |
| GLU          | 45          | 31         | 39           | 1         | 18         | 0            | 46         | 1        | 24.86%        | 21.55%        | 17.13%        | 25.97%        | 10.50%        |
| HIS          | 3           | 4          | 1            | 0         | 8          | 0            | 9          | 0        | 12.00%        | 4.00%         | 16.00%        | 36.00%        | 32.00%        |
| ILE          | 65          | 39         | 5            | 0         | 9          | 6            | 16         | 0        | 46.43%        | 3.57%         | 27.86%        | 15.71%        | 6.43%         |
| LEU          | 177         | 85         | 42           | 3         | 38         | 2            | 148        | 2        | 35.61%        | 8.45%         | 17.10%        | 30.58%        | 8.25%         |
| LYS          | 21          | 6          | 3            | 0         | 0          | 0            | 5          | 0        | 60.00%        | 8.57%         | 17.14%        | 14.29%        | 0.00%         |
| MET          | 30          | 11         | 9            | 0         | 0          | 0            | 10         | 0        | 50.00%        | 15.00%        | 18.33%        | 16.67%        | 0.00%         |
| PHE          | 20          | 10         | 8            | 1         | 22         | 0            | 21         | 0        | 24.39%        | 9.76%         | 12.20%        | 25.61%        | 28.05%        |
| PRO          | 38          | 14         | 3            | 0         | 1          | 0            | 22         | 0        | 48.72%        | 3.85%         | 17.95%        | 28.21%        | 1.28%         |
| SER          | 5           | 7          | 1            | 6         | 3          | 0            | 6          | 0        | 17.86%        | 3.57%         | 25.00%        | 21.43%        | 32.14%        |
| THR          | 7           | 6          | 6            | 2         | 9          | 5            | 9          | 0        | 15.91%        | 13.64%        | 13.64%        | 31.82%        | 25.00%        |
| TRP          | 10          | 0          | 7            | 0         | 2          | 0            | 7          | 0        | 38.46%        | 26.92%        | 0.00%         | 26.92%        | 7.69%         |
| TYR          | 13          | 4          | 7            | 0         | 24         | 0            | 6          | 1        | 23.64%        | 12.73%        | 7.27%         | 12.73%        | 43.64%        |
| VAL          | 32          | 18         | 2            | 1         | 44         | 1            | 29         | 0        | 25.20%        | 1.57%         | 14.17%        | 23.62%        | 35.43%        |
| <b>Total</b> | <b>542</b>  | <b>269</b> | <b>169</b>   | <b>14</b> | <b>207</b> | <b>16</b>    | <b>388</b> | <b>4</b> | <b>33.69%</b> | <b>10.50%</b> | <b>16.72%</b> | <b>25.36%</b> | <b>13.74%</b> |

**Table S6.** The secondary structure of the outlier residue in EM-4-6-2019

|     | <b>Loop</b> |          | <b>Sheet</b> |          |          | <b>Helix</b> |          |          | <b>-</b> | <b>T</b> | <b>S</b> | <b>Helix</b> | <b>Sheet</b> |
|-----|-------------|----------|--------------|----------|----------|--------------|----------|----------|----------|----------|----------|--------------|--------------|
|     | <b>-</b>    | <b>S</b> | <b>T</b>     | <b>B</b> | <b>E</b> | <b>G</b>     | <b>H</b> | <b>I</b> |          |          |          |              |              |
| ARG | 27          | 3        | 10           | 0        | 0        | 4            | 6        | 0        | 54.00%   | 20.00%   | 6.00%    | 20.00%       | 0.00%        |
| ASN | 0           | 11       | 1            | 0        | 0        | 1            | 15       | 0        | 0.00%    | 3.57%    | 39.29%   | 57.14%       | 0.00%        |
| ASP | 6           | 23       | 2            | 0        | 3        | 0            | 3        | 0        | 16.22%   | 5.41%    | 62.16%   | 8.11%        | 8.11%        |
| CYS | 5           | 2        | 1            | 0        | 3        | 0            | 2        | 0        | 38.46%   | 7.69%    | 15.38%   | 15.38%       | 23.08%       |
| GLN | 48          | 10       | 12           | 4        | 1        | 3            | 10       | 0        | 54.55%   | 13.64%   | 11.36%   | 14.77%       | 5.68%        |
| GLU | 86          | 60       | 48           | 2        | 0        | 1            | 26       | 0        | 38.57%   | 21.52%   | 26.91%   | 12.11%       | 0.90%        |
| HIS | 0           | 0        | 0            | 0        | 5        | 0            | 0        | 0        | 0.00%    | 0.00%    | 0.00%    | 0.00%        | 100.00%      |
| ILE | 120         | 35       | 23           | 9        | 29       | 2            | 32       | 4        | 47.24%   | 9.06%    | 13.78%   | 14.96%       | 14.96%       |

|       |     |     |     |    |     |    |     |    |         |        |        |        |        |
|-------|-----|-----|-----|----|-----|----|-----|----|---------|--------|--------|--------|--------|
| LEU   | 534 | 251 | 210 | 11 | 180 | 26 | 500 | 11 | 30.99%  | 12.19% | 14.57% | 31.17% | 11.09% |
| LYS   | 36  | 5   | 8   | 0  | 0   | 0  | 19  | 0  | 52.94%  | 11.76% | 7.35%  | 27.94% | 0.00%  |
| MET   | 31  | 4   | 2   | 0  | 1   | 1  | 17  | 4  | 51.67%  | 3.33%  | 6.67%  | 36.67% | 1.67%  |
| PHE   | 2   | 28  | 4   | 0  | 6   | 0  | 12  | 0  | 3.85%   | 7.69%  | 53.85% | 23.08% | 11.54% |
| PRO   | 29  | 4   | 7   | 0  | 2   | 0  | 10  | 0  | 55.77%  | 13.46% | 7.69%  | 19.23% | 3.85%  |
| SER   | 2   | 0   | 0   | 0  | 0   | 0  | 0   | 0  | 100.00% | 0.00%  | 0.00%  | 0.00%  | 0.00%  |
| THR   | 4   | 1   | 1   | 0  | 3   | 5  | 0   | 0  | 28.57%  | 7.14%  | 7.14%  | 35.71% | 21.43% |
| TRP   | 5   | 0   | 3   | 0  | 0   | 0  | 10  | 0  | 27.78%  | 16.67% | 0.00%  | 55.56% | 0.00%  |
| TYR   | 14  | 6   | 3   | 1  | 23  | 1  | 10  | 0  | 24.14%  | 5.17%  | 10.34% | 18.97% | 41.38% |
| VAL   | 50  | 16  | 16  | 0  | 4   | 0  | 55  | 0  | 35.46%  | 11.35% | 11.35% | 39.01% | 2.84%  |
| Total | 999 | 459 | 351 | 27 | 260 | 44 | 727 | 19 | 34.62%  | 12.16% | 15.90% | 27.37% | 9.94%  |
